# Supplementary material for: The Rational Design of Therapeutic Peptides for Aminopeptidase N using a Substrate-Based Approach
Source: PubMed Central journal article supplement (PMC5431086; doi:10.1038/s41598-017-01542-5), 2017-05-02
Supplement: 41598_2017_1542_MOESM1_ESM.pdf [file 41598_2017_1542_MOESM1_ESM.pdf]

**Supplemental Information**

**The Rational Design of Therapeutic Peptides for  
Aminopeptidase N using a Substrate-Based Approach**

Shilvi Joshi<sup>1</sup>, Lang Chen <sup>1</sup>, Michael B. Winter<sup>2</sup>, Yi-Lun Lin<sup>1</sup>, Yang Yang<sup>1</sup>, Mariya Shapovalova<sup>1</sup>,  
Paige M. Smith<sup>1</sup>, Chang Liu <sup>1</sup>, Fang Li<sup>1</sup> and Aaron M. LeBeau<sup>1</sup>

<sup>1</sup> Department of Pharmacology, University of Minnesota Medical School, Minneapolis, MN  
55455, USA

<sup>2</sup> Department of Pharmaceutical Chemistry, University of California, San Francisco, CA 94153,  
USA

# Supplemental Figure 1

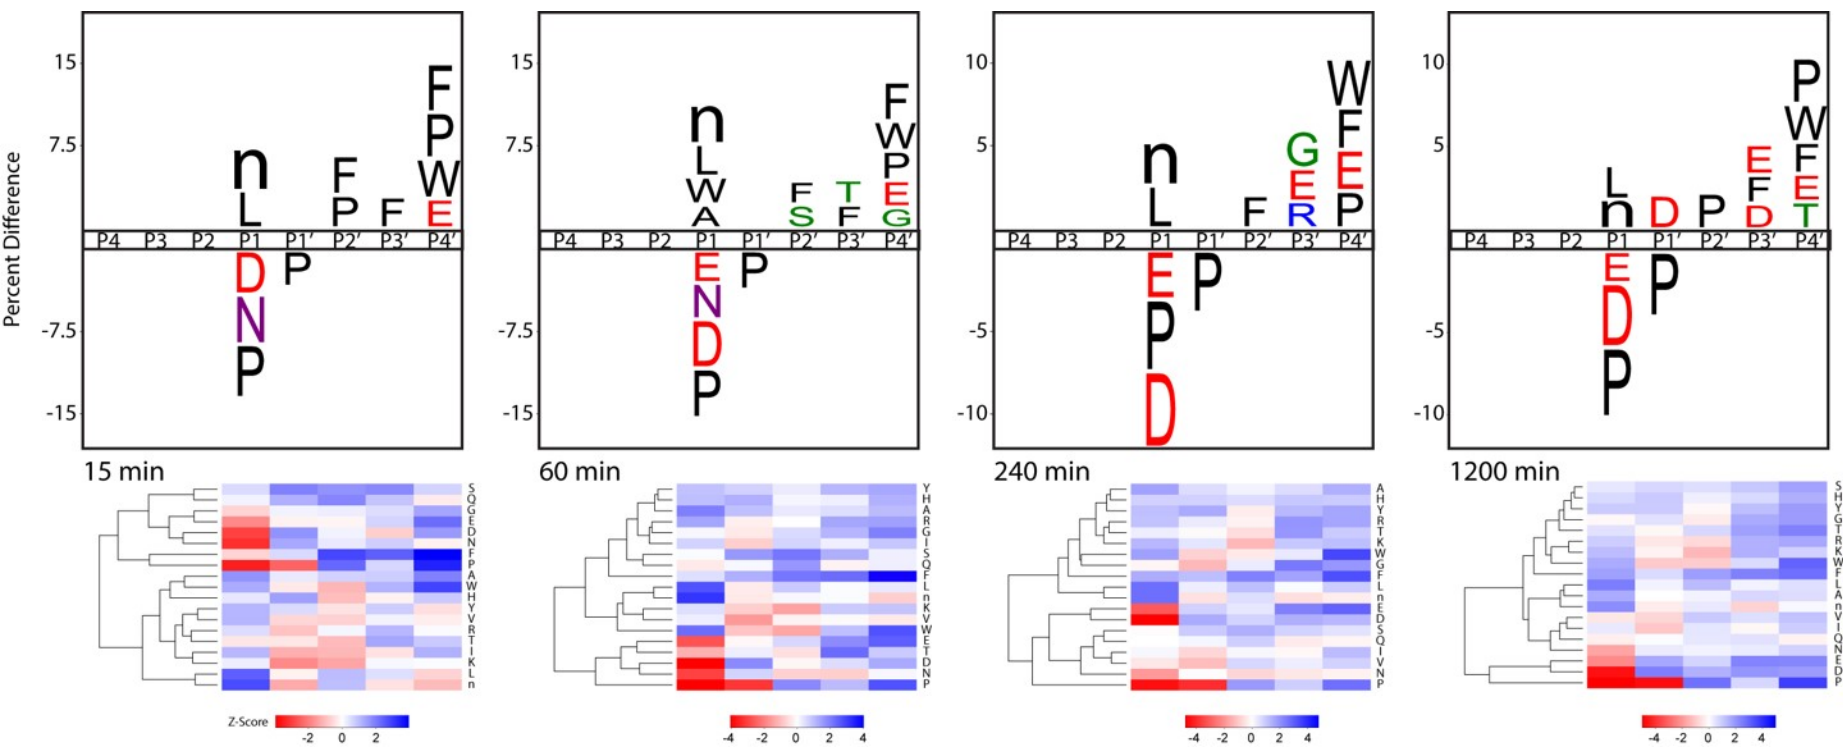

**Supplemental Figure 1:** Global identification of hAPN substrate specificity with the MSP-MS assay. (Top) iceLogo representation of P1-P4' specificity at the 15, 60, 240, and 1200 min assay time points ( $P \leq 0.05$  for all residues shown; "n" is norleucine). (Bottom) Heat map representations of hAPN P1-P4' specificity at the 15, 60, 240, and 1200 min assay time points calculated using Z-scores at each position. Favored residues are colored blue (Z-score  $> 0$ ) and disfavored residues are colored red (Z-score  $< 0$ ).

# Supplemental Figure 2

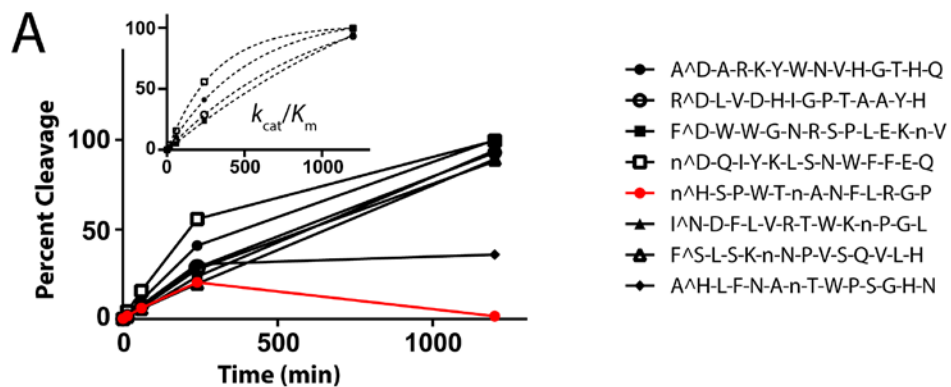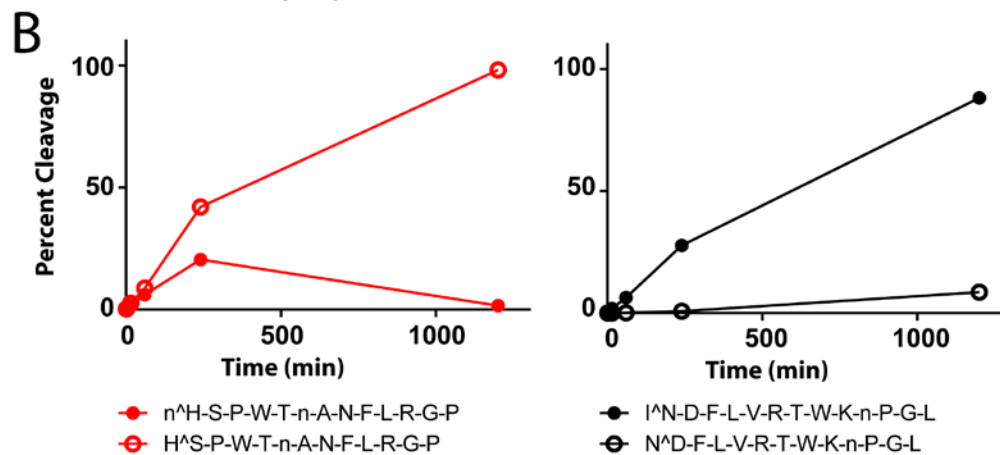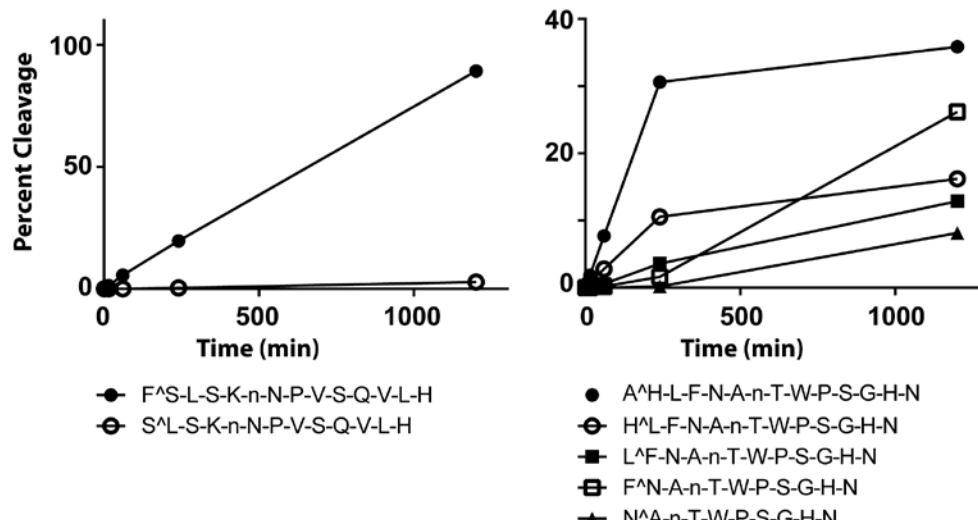

**Supplemental Figure 2:** Comparison of hAPN cleavage against a panel of 14-mer peptides from the MSP-MS library that underwent complete hydrolysis during the assay time course and that were selected for inhibitor development (Table I). A.) Cleavage time courses for hAPN removal of the primary N-terminal amino acid in the panel of substrates. Inset.) Determination of  $k_{\text{cat}}/K_m$  values for substrates that did not undergo secondary cleavage events. Notably, these substrates contain aspartic acid, which is a disfavorable P1 residue for hAPN, at the second position. Arrows (^) indicate the site(s) of cleavage.  $k_{\text{cat}}/K_m$  values were as follows:  $1.67 (\pm 0.08) \times 10^4$ ,  $9.03 (\pm 0.36) \times 10^3$ ,  $4.46 (\pm 0.75) \times 10^3$ , and  $2.85 (\pm 0.15) \times 10^4 \text{ M}^{-1}\text{s}^{-1}$  for A^D-A-R-K-Y-W-N-V-H-G-T-H-Q, R^D-L-V-D-H-I-G-P-T-A-A-Y-H, F^D-W-W-G-N-R-S-P-L-E-K-n-V, and n^D-Q-I-Y-K-L-S-N-W-F-F-E-Q, respectively. B.) Time courses showing secondary cleavage events for a subset of the panel. The five terminal residues (P1-P4') of the substrate n-H-S-P-W-T-n-A-N-F-L-R-G-P (red) was the most effective hAPN inhibitor in the absence of cyclization (Table I).

### Supplemental Figure 3

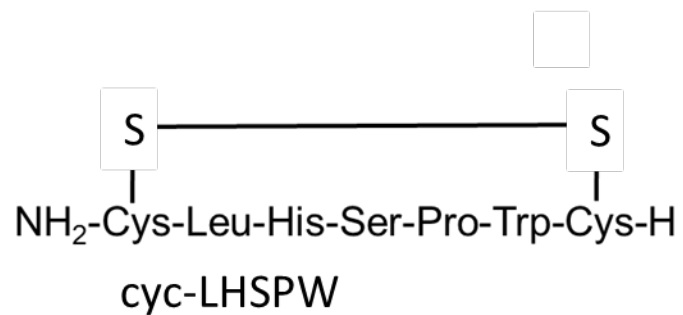

=

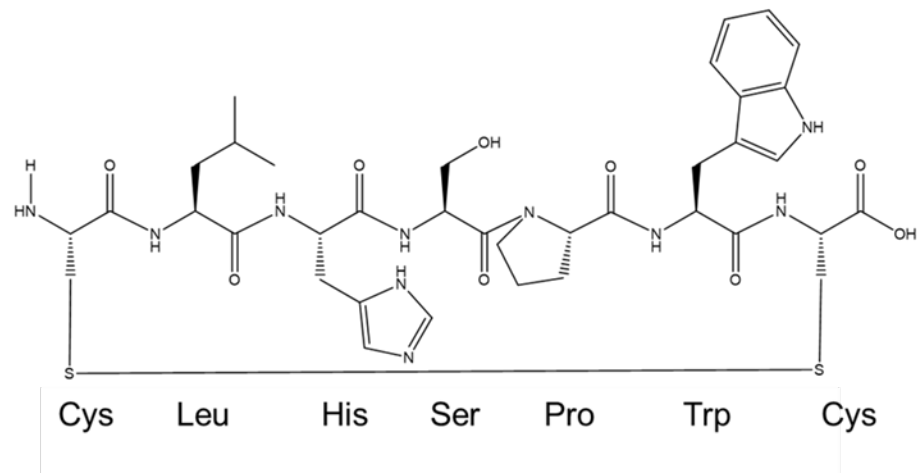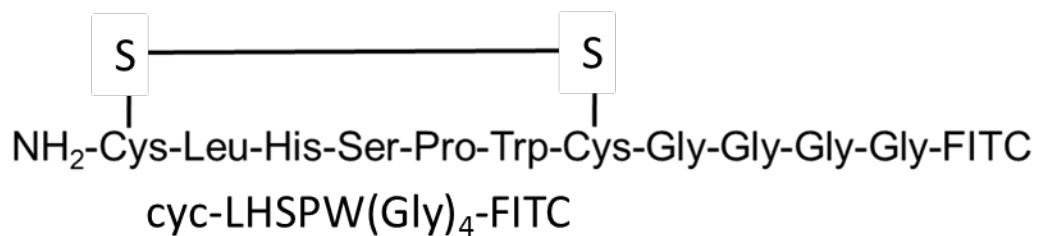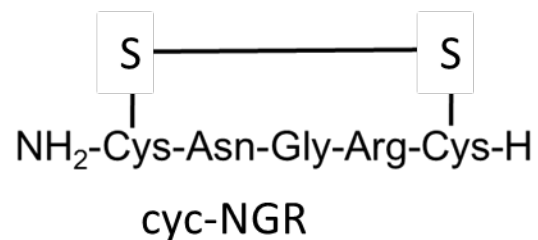

**Supplemental Figure 3:** Structures of the salient cyclic peptides used in this study.

S

# Supplemental Figure 4

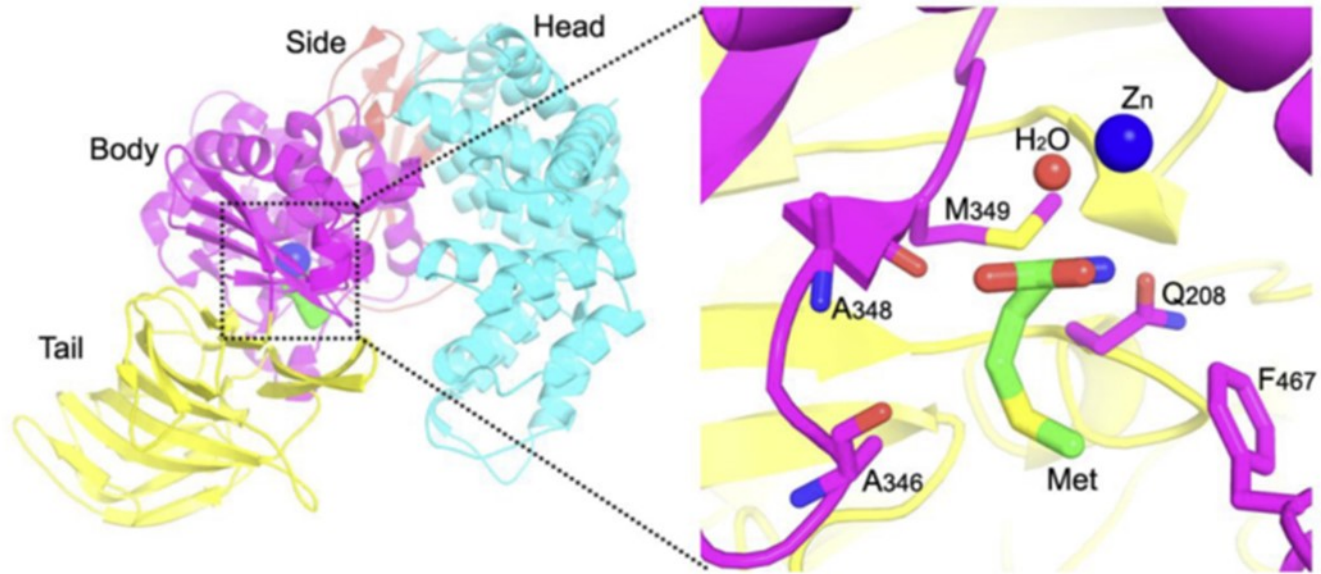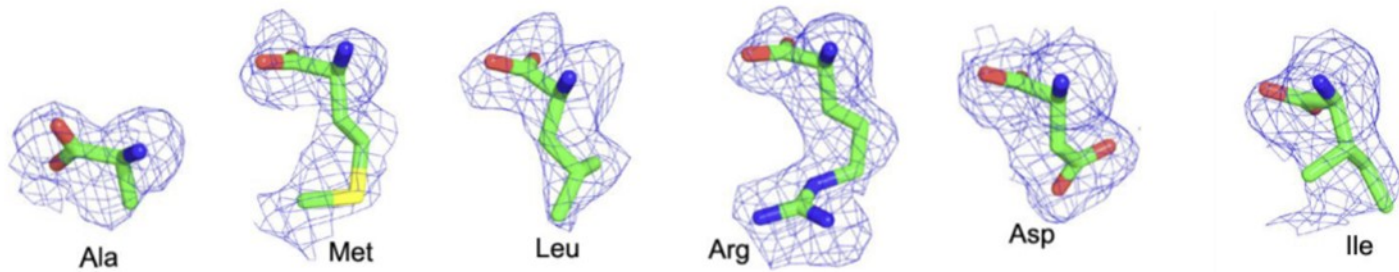



**Supplemental Figure 4:** Electron density of the amino acid side chains.

# Supplemental Figure 5

| Data                      | Arg/pAPN complex | Asp/pAPN complex | Ala/pAPN complex | Ile/pAPN complex | Leu/pAPN complex | Met/pAPN complex |
|---------------------------|------------------|------------------|------------------|------------------|------------------|------------------|
| PDB code                  | 4IYV             | 4IYW             | 4IYY             | 4IYZ             | 4IZ1             | 4IZ2             |
| <b>Data collection</b>    |                  |                  |                  |                  |                  |                  |
| Space group               | C2               | C2               | C2               | C2               | C2               | C2               |
| Cell parameter            |                  |                  |                  |                  |                  |                  |
| a(Å)                      | 260.7            | 259.8            | 260.6            | 260.4            | 259.6            | 260.7            |
| b(Å)                      | 62.9             | 62.7             | 62.7             | 62.9             | 63.0             | 62.9             |
| c(Å)                      | 81.7             | 81.7             | 81.6             | 81.7             | 81.6             | 81.6             |
| α(°)                      | 90.0             | 90.0             | 90.0             | 90.0             | 90.0             | 90.0             |
| β(°)                      | 100.6            | 100.4            | 100.3            | 100.5            | 100.4            | 100.4            |
| γ(°)                      | 90.0             | 90.0             | 90.0             | 90.0             | 90.0             | 90.0             |
| Wavelength (Å)            | 1.00003          | 0.97918          | 0.97918          | 1.00003          | 1.00003          | 1.00003          |
| Resolution (Å)            | 50 - 1.86        | 50 - 2.00        | 50 - 2.10        | 50 - 2.15        | 50 - 2.20        | 50 - 2.03        |
| No. reflections           | 107699           | 85779            | 75984            | 69735            | 65231            | 84218            |
| % completeness            | 98.2             | 97.8             | 99.9             | 99.0             | 99.1             | 98.9             |
| (last shell)              | (84.4)           | (97.2)           | (99.8)           | (92.6)           | (95.7)           | (90.0)           |
| Rmerge                    | 0.075            | 0.062            | 0.061            | 0.116            | 0.092            | 0.085            |
| (last shell)              | (0.484)          | (0.574)          | (0.464)          | (0.572)          | (0.601)          | (0.425)          |
| I/σ                       | 18.6             | 19.6             | 20.1             | 16.3             | 22.8             | 21.4             |
| (last shell)              | (1.9)            | (2.4)            | (3.1)            | (2.3)            | (2.6)            | (3.6)            |
| Redundancy                | 4.3              | 3.7              | 3.7              | 6.5              | 7.1              | 7.4              |
| (last shell)              | (2.4)            | (3.7)            | (3.8)            | (4.4)            | (4.8)            | (5.5)            |
| <b>Refinement</b>         |                  |                  |                  |                  |                  |                  |
| Resolution (Å)            | 50 - 1.86        | 50 - 2.00        | 50 - 2.10        | 50 - 2.15        | 50 - 2.20        | 50 - 2.03        |
| Rwork / Rfree             | 0.154/0.229      | 0.140/0.223      | 0.135/0.213      | 0.143/0.231      | 0.142/0.245      | 0.141/0.216      |
| No. Atom                  |                  |                  |                  |                  |                  |                  |
| Protein                   | 7241             | 7241             | 7241             | 7241             | 7241             | 7241             |
| Carbohydrate              | 322              | 322              | 322              | 322              | 322              | 322              |
| Ligand                    | 12               | 9                | 5                | 9                | 9                | 9                |
| Ion                       | 1                | 1                | 1                | 1                | 1                | 1                |
| Solvent                   | 1533             | 1633             | 1537             | 1497             | 1566             | 1457             |
| <b>RMS Deviations</b>     |                  |                  |                  |                  |                  |                  |
| Bond length (Å)           | 0.006            | 0.005            | 0.005            | 0.006            | 0.006            | 0.006            |
| Bond angle (°)            | 0.995            | 0.964            | 0.973            | 1.062            | 1.076            | 0.990            |
| B factor                  | 30.5             | 31.0             | 29.1             | 36.8             | 34.1             | 31.3             |
| <b>Ramachandran plot:</b> |                  |                  |                  |                  |                  |                  |
| core,                     | 96.4%            | 96.4%            | 96.9%            | 96.3%            | 95.3%            | 96%              |
| allow,                    | 2.9%             | 2.9%             | 2.4%             | 2.9%             | 3.9%             | 3.2%             |
| disallow                  | 0.7%             | 0.7%             | 0.7%             | 0.8%             | 0.8%             | 0.8%             |

Data were collected at APS beamline 24-ID and ALS beamline 4.2.2.

$R_{\text{merge}} = \sum_{i,h} | |i_{i,h} - \langle |h \rangle | / \sum_{i,h} | |i_{i,h} |$  where  $\langle |h \rangle$  is the mean of the  $i$  observations of the reflection  $h$ .

$R_{\text{work}} = \sum ||F_o| - |F_c|| / \sum |F_o|$ .  $R_{\text{free}}$  is the same statistic, but calculated from a subset of the data (5%) that has not been used in refinement.

**Supplemental Figure 5: Statistics of the X-ray crystallographic data.**
